# Supplementary material for: Identification of endothelial-related molecular subtypes for bladder cancer patients
Source: Front Oncol. 2023 Mar 21;13:1101055. doi: 10.3389/fonc.2023.1101055 (PMC10070733; doi:10.3389/fonc.2023.1101055)
Supplement: Supplementary file 2 [file Table_1.xlsx]

## Sheet: Sheet1
Supplementary table 1. Endothelial cell related genes based on EPIC.
Genes	correlation	pvalue
PLXND1	0.401384	1.57e-16
HSPB6	0.468371	1.17e-22
PDK4	0.444098	2.8e-20
MEOX1	0.580052	1.92e-36
TBXA2R	0.470418	7.2e-23
GAS7	0.315608	1.81e-10
CD79B	0.324558	5.11e-11
SELE	0.477278	1.4e-23
NCAPD2	-0.305459	7.24e-10
IFFO1	0.337582	7.52e-12
SEMA3G	0.574497	1.25e-35
STAB1	0.333237	1.44e-11
DCN	0.340381	4.92e-12
ADGRA2	0.515631	7.1e-28
FHL1	0.398283	2.81e-16
VIM	0.345793	2.14e-12
ARHGAP31	0.410647	2.68e-17
UBA6	-0.303968	8.83e-10
TIMP2	0.303607	9.26e-10
FLT4	0.627608	4.19e-44
EPHA3	0.380615	6.84e-15
ELN	0.497514	8.85e-26
LAMC3	0.491443	4.19e-25
CHRDL2	0.369205	4.86e-14
SLC2A3	0.354806	5.18e-13
PSD	0.347001	1.78e-12
LZTS1	0.411912	2.1e-17
GUCY1B3	0.410947	2.53e-17
POLD1	-0.302284	1.1e-09
CALCRL	0.57633	6.78e-36
SLC9A3R2	0.321164	8.3e-11
MYLK	0.387199	2.13e-15
TIE1	0.683959	4.26e-55
EML1	0.35646	3.97e-13
PLPP1	0.323209	6.21e-11
HYAL2	0.408398	4.14e-17
INPP5A	0.373044	2.53e-14
RASGRP2	0.430645	4.85e-19
ADGRF5	0.56787	1.12e-34
TGFBR3	0.335505	1.03e-11
RPS6KA2	0.467547	1.42e-22
VASH1	0.358594	2.81e-13
LMCD1	0.392872	7.62e-16
LIMS2	0.487031	1.27e-24
MRVI1	0.502391	2.48e-26
FERMT2	0.384603	3.38e-15
MGLL	0.301681	1.2e-09
SCARF1	0.535107	2.84e-30
ENO1	-0.326787	3.71e-11
TACR2	0.30882	4.6e-10
MCAM	0.486272	1.54e-24
PPP1R12B	0.408425	4.12e-17
FGFR1	0.355305	4.78e-13
ITGA8	0.599061	2.37e-39
ITM2A	0.440784	5.72e-20
TNS1	0.434457	2.19e-19
MOXD1	0.344391	2.66e-12
MEF2C	0.530064	1.23e-29
FCN1	0.425191	1.49e-18
NID2	0.349795	1.15e-12
REM1	0.37998	7.64e-15
HEPH	0.357651	3.27e-13
CHRD	0.322587	6.78e-11
ANGPT2	0.350354	1.05e-12
CD200	0.447531	1.32e-20
CCDC80	0.303617	9.25e-10
DPYSL2	0.367748	6.2e-14
SH2D3C	0.551992	1.76e-32
SORBS1	0.358941	2.66e-13
GADD45B	0.367259	6.73e-14
SUSD2	0.333353	1.42e-11
GGT5	0.391979	8.97e-16
MFNG	0.355522	4.61e-13
TTC28	0.30239	1.09e-09
CBX7	0.314832	2.02e-10
PDGFB	0.422664	2.48e-18
CSF2RB	0.37337	2.4e-14
CTSG	0.461351	5.96e-22
NFATC4	0.328071	3.08e-11
NFATC2	0.321783	7.61e-11
MYL9	0.393097	7.32e-16
PPP1R16B	0.348688	1.36e-12
STS	0.315514	1.84e-10
FLT1	0.487485	1.13e-24
RGCC	0.422112	2.78e-18
MEDAG	0.420485	3.85e-18
ZNF423	0.329651	2.44e-11
WFDC1	0.513296	1.34e-27
CRISPLD2	0.450161	7.41e-21
FOXF1	0.51918	2.67e-28
RASL12	0.505438	1.11e-26
SYDE1	0.31904	1.12e-10
GPI	-0.333118	1.47e-11
CLIP3	0.335632	1.01e-11
CPED1	0.391122	1.05e-15
NPTX2	0.334502	1.19e-11
PCOLCE	0.324094	5.47e-11
PRUNE2	0.316093	1.69e-10
OGN	0.364623	1.04e-13
ENG	0.53584	2.29e-30
CA9	-0.325747	4.31e-11
NPDC1	0.332046	1.72e-11
PTGDS	0.424157	1.84e-18
CXCL12	0.394795	5.36e-16
PALD1	0.377352	1.21e-14
ACTA2	0.422965	2.34e-18
P2RX1	0.386965	2.22e-15
RASD1	0.356486	3.95e-13
ICAM2	0.390648	1.14e-15
CCL2	0.331337	1.91e-11
CNTNAP1	0.392161	8.68e-16
SGCA	0.426056	1.25e-18
SLC16A6	0.311408	3.23e-10
PMP22	0.335015	1.11e-11
SOD3	0.410089	2.99e-17
NEIL3	-0.311633	3.14e-10
CRYAB	0.330915	2.03e-11
ARHGEF17	0.401449	1.55e-16
VWF	0.705951	4.29e-60
TSPAN11	0.332949	1.5e-11
TNS2	0.601802	8.69e-40
SH2B3	0.308308	4.93e-10
MGP	0.405536	7.17e-17
TPI1	-0.328591	2.85e-11
SASH1	0.316781	1.54e-10
SOBP	0.47575	2.02e-23
SMOC2	0.398446	2.73e-16
LAMA4	0.400465	1.87e-16
C7	0.445976	1.86e-20
SPARC	0.364117	1.14e-13
PCDH12	0.600254	1.53e-39
PDGFRB	0.398258	2.82e-16
EFCC1	0.371889	3.08e-14
ZBTB47	0.337165	8.01e-12
CENPA	-0.30139	1.24e-09
IGFBP5	0.329167	2.62e-11
EFHD1	0.373388	2.39e-14
IL1R1	0.363774	1.2e-13
TRAK2	0.321504	7.91e-11
EPAS1	0.399755	2.14e-16
ANGPTL1	0.377079	1.27e-14
RGS2	0.378253	1.03e-14
HSD11B1	0.410717	2.65e-17
C1orf54	0.390098	1.26e-15
CTGF	0.405451	7.29e-17
TCF21	0.505843	9.98e-27
CASQ2	0.361901	1.64e-13
PCDH17	0.509294	3.97e-27
KLF9	0.454622	2.74e-21
NR4A3	0.405684	6.97e-17
CNRIP1	0.449723	8.17e-21
DUSP1	0.352617	7.34e-13
TEK	0.647774	9.03e-48
MYCT1	0.69138	9.85e-57
MND1	-0.31279	2.68e-10
TSHZ3	0.351786	8.37e-13
KCNJ8	0.386901	2.25e-15
POPDC2	0.423715	2.01e-18
KIF18A	-0.309146	4.4e-10
CPXM2	0.390308	1.22e-15
CXCR4	0.315532	1.83e-10
FMOD	0.300568	1.38e-09
RAMP3	0.58683	1.86e-37
CALD1	0.326537	3.84e-11
ITIH5	0.546205	1.04e-31
MMP19	0.363622	1.23e-13
NR4A1	0.402889	1.19e-16
HJURP	-0.30881	4.61e-10
PTGIS	0.374707	1.91e-14
F13A1	0.326031	4.14e-11
CPNE5	0.398358	2.77e-16
PTGER2	0.422067	2.8e-18
FOSB	0.314464	2.12e-10
CD93	0.625266	1.07e-43
F10	0.41045	2.79e-17
RHOJ	0.706508	3.16e-60
PTPRB	0.500244	4.36e-26
PLA2G5	0.371299	3.41e-14
KLF2	0.521021	1.6e-28
F2RL3	0.546815	8.62e-32
GNG11	0.569154	7.37e-35
ZFP36	0.315091	1.95e-10
PAICS	-0.351192	9.2e-13
KDR	0.592491	2.52e-38
PPAT	-0.329684	2.43e-11
FLNC	0.332459	1.62e-11
CHN1	0.30412	8.65e-10
CGNL1	0.308185	5.01e-10
DLL4	0.599657	1.91e-39
STARD8	0.523286	8.46e-29
CNN1	0.381549	5.8e-15
PLVAP	0.636377	1.15e-45
PXDN	0.353264	6.62e-13
DKC1	-0.372772	2.65e-14
COX4I2	0.483754	2.87e-24
HIGD1B	0.517364	4.41e-28
NFATC1	0.309543	4.17e-10
GALNT15	0.312949	2.62e-10
AOC3	0.464142	3.13e-22
RAMP2	0.5379	1.25e-30
TMEM204	0.463509	3.62e-22
MAP1B	0.3587	2.76e-13
RAI2	0.354737	5.23e-13
RAN	-0.304154	8.61e-10
SERPINF1	0.326004	4.15e-11
HSPA12B	0.531965	7.09e-30
NES	0.32754	3.32e-11
SYT11	0.348796	1.34e-12
STARD13	0.480473	6.42e-24
MYH11	0.412433	1.89e-17
GIMAP6	0.419131	5.05e-18
GIMAP4	0.391326	1.01e-15
LYVE1	0.515505	7.35e-28
CTIF	0.311451	3.22e-10
PSRC1	-0.320359	9.31e-11
IL6ST	0.340966	4.5e-12
APLNR	0.53614	2.1e-30
PDGFRA	0.461119	6.28e-22
COL4A2	0.49084	4.88e-25
LMO2	0.318592	1.19e-10
ITGA7	0.429605	6.02e-19
DYSF	0.479614	7.92e-24
AGT	0.413629	1.5e-17
EDNRB	0.585248	3.22e-37
IL6	0.378644	9.65e-15
ALPK3	0.417235	7.37e-18
HLX	0.460272	7.62e-22
GYPC	0.418178	6.11e-18
ANGPTL2	0.358582	2.81e-13
ENPP2	0.41832	5.94e-18
ARRB1	0.343885	2.88e-12
LRRC32	0.510349	2.99e-27
FXYD6	0.342593	3.51e-12
THBS1	0.339327	5.78e-12
EMILIN1	0.404978	7.97e-17
CH25H	0.366052	8.24e-14
ENTPD1	0.432879	3.05e-19
ARHGAP24	0.337059	8.14e-12
FGF2	0.314793	2.03e-10
PDE5A	0.324961	4.83e-11
CENPE	-0.300442	1.41e-09
ENPEP	0.317822	1.33e-10
ACVRL1	0.572589	2.37e-35
FBLN5	0.44515	2.23e-20
FGF7	0.436889	1.31e-19
TPM1	0.331644	1.82e-11
TICRR	-0.329552	2.48e-11
TGFB1I1	0.338052	7.01e-12
CDH11	0.327842	3.18e-11
IGFBP4	0.325739	4.31e-11
ADAMTS10	0.390231	1.23e-15
HSPG2	0.420276	4.02e-18
CYR61	0.390461	1.18e-15
RGS5	0.625142	1.13e-43
RGL1	0.373427	2.37e-14
ATP8B2	0.322488	6.88e-11
RP5-862P8.2	-0.316339	1.64e-10
RHOB	0.318395	1.23e-10
CHAC2	-0.308777	4.63e-10
CDCA7	-0.306827	6.02e-10
CSRNP1	0.41319	1.63e-17
ITGA9	0.456859	1.66e-21
COL8A1	0.347995	1.52e-12
PLA1A	0.338218	6.84e-12
BOC	0.427028	1.02e-18
SLIT2	0.331086	1.98e-11
KCNMB1	0.387301	2.09e-15
DAAM2	0.438107	1.01e-19
DENND2A	0.437112	1.25e-19
CXorf36	0.761623	4.18e-75
CSGALNACT1	0.424334	1.77e-18
GSN	0.394941	5.22e-16
ZEB1	0.454078	3.1e-21
PAMR1	0.500885	3.69e-26
P4HA3	0.329274	2.58e-11
ADAM33	0.393934	6.28e-16
ESAM	0.636772	9.77e-46
TAGLN	0.384565	3.41e-15
JPH2	0.319206	1.1e-10
CLEC1A	0.490937	4.76e-25
LATS2	0.315985	1.72e-10
ADRA2A	0.411142	2.44e-17
DIXDC1	0.33742	7.71e-12
CCDC3	0.397052	3.53e-16
EDNRA	0.387976	1.85e-15
FLI1	0.380341	7.17e-15
KCNE4	0.432096	3.59e-19
HSPB8	0.389939	1.3e-15
SPARCL1	0.589506	7.26e-38
UTRN	0.315543	1.83e-10
RASSF3	0.31912	1.11e-10
LGI4	0.464858	2.65e-22
THY1	0.357012	3.63e-13
ROBO4	0.659739	4.42e-50
ABI3BP	0.428912	6.94e-19
PGM5	0.434612	2.12e-19
PDLIM3	0.350945	9.57e-13
SORBS2	0.349618	1.18e-12
JAM2	0.588455	1.05e-37
ADAMTS1	0.46845	1.15e-22
FGD5	0.428278	7.91e-19
TMEM237	-0.305966	6.76e-10
ELMO1	0.314427	2.14e-10
GNA14	0.370127	4.16e-14
RBPMS	0.353771	6.11e-13
TSC22D3	0.334058	1.27e-11
ERG	0.549791	3.47e-32
TSPAN18	0.468823	1.05e-22
SHROOM4	0.407835	4.62e-17
CD1D	0.348133	1.49e-12
ADAMTS4	0.475372	2.21e-23
STC1	0.420138	4.13e-18
CSRP1	0.361752	1.68e-13
RCAN1	0.418672	5.53e-18
ACTC1	0.321155	8.31e-11
ACE	0.393598	6.68e-16
NPR2	0.309161	4.39e-10
PLPP7	0.340438	4.88e-12
COX7A1	0.514707	9.15e-28
PLXDC1	0.321383	8.05e-11
CYGB	0.49633	1.2e-25
FMNL3	0.307209	5.72e-10
GRASP	0.475148	2.33e-23
BCL6B	0.613439	1.1e-41
PLPP3	0.391305	1.01e-15
RBP7	0.315259	1.9e-10
NEXN	0.310025	3.91e-10
ADGRL4	0.683087	6.58e-55
VCAM1	0.353061	6.84e-13
DDR2	0.389107	1.51e-15
FRZB	0.497685	8.47e-26
ACTG2	0.373893	2.19e-14
INHBB	0.342596	3.51e-12
COL6A3	0.315832	1.76e-10
FSTL1	0.35751	3.35e-13
LMOD1	0.429188	6.56e-19
IGFBP7	0.473901	3.15e-23
TGFBR2	0.301096	1.29e-09
PRICKLE2	0.344945	2.44e-12
ADAMTS9	0.660459	3.19e-50
CPA3	0.42362	2.05e-18
TM4SF18	0.460986	6.48e-22
CLEC3B	0.609738	4.51e-41
HEYL	0.468606	1.1e-22
EMCN	0.733388	5.1e-67
SPRY1	0.556915	3.77e-33
HAND2	0.350122	1.09e-12
FAM198B	0.395866	4.4e-16
EGFLAM	0.372159	2.95e-14
EBF1	0.551101	2.31e-32
PI16	0.395653	4.58e-16
SOX17	0.685929	1.58e-55
DLC1	0.485731	1.76e-24
SBSPON	0.380723	6.71e-15
NOS3	0.564913	2.94e-34
GEM	0.446137	1.8e-20
ZCCHC24	0.376131	1.49e-14
VSTM4	0.473666	3.33e-23
HPRT1	-0.39318	7.21e-16
KIAA1462	0.415667	1e-17
JAM3	0.458208	1.22e-21
FBN1	0.321301	8.14e-11
CYYR1	0.669307	5.26e-52
DCHS1	0.475437	2.18e-23
MFAP4	0.466018	2.02e-22
RBPMS2	0.376075	1.51e-14
MAP1A	0.368094	5.85e-14
MAPRE2	0.31079	3.52e-10
PPP1R14A	0.478347	1.08e-23
SEMA6B	0.55175	1.89e-32
TMEM88	0.570788	4.3e-35
SCARA5	0.469018	1e-22
VASN	0.397719	3.12e-16
COA6	-0.304027	8.76e-10
ACOX2	0.303654	9.21e-10
FAM107A	0.594964	1.04e-38
FILIP1L	0.415981	9.44e-18
BDKRB2	0.333652	1.35e-11
TNXB	0.501956	2.78e-26
SDPR	0.533772	4.2e-30
PKIG	0.39801	2.96e-16
PARM1	0.323848	5.66e-11
NPR1	0.497357	9.22e-26
ZEB2	0.376489	1.4e-14
CLIC3	0.300721	1.36e-09
LDB2	0.690895	1.26e-56
DCLK2	0.345072	2.4e-12
CDCA4	-0.304383	8.35e-10
CYTL1	0.533538	4.49e-30
PDGFD	0.455922	2.05e-21
S1PR1	0.655889	2.52e-49
INSR	0.332452	1.62e-11
GIMAP8	0.434201	2.31e-19
SYNPO	0.350084	1.1e-12
MAL	0.327823	3.19e-11
LAMB2	0.305194	7.5e-10
TPSAB1	0.419921	4.31e-18
CSDC2	0.33419	1.25e-11
RCAN2	0.509865	3.4e-27
SYNPO2	0.427488	9.31e-19
RND1	0.32743	3.38e-11
CCL19	0.337837	7.24e-12
EGFL7	0.443236	3.37e-20
MRGPRF	0.436105	1.55e-19
SH3RF3	0.367973	5.98e-14
HPSE2	0.388127	1.8e-15
ADCY5	0.409072	3.64e-17
MMRN2	0.495674	1.42e-25
NAA20	-0.314382	2.15e-10
CSPG4	0.345832	2.13e-12
HSPB7	0.368037	5.91e-14
HEG1	0.317945	1.31e-10
C1QTNF1	0.301979	1.15e-09
CD34	0.710535	3.4e-61
MSRB3	0.395911	4.36e-16
SELP	0.542751	2.94e-31
PODN	0.416234	8.98e-18
SLCO2A1	0.529917	1.28e-29
SLCO2A1.1	0.529917	1.28e-29
FZD4	0.444821	2.39e-20
CD248	0.406852	5.57e-17
DES	0.328239	3e-11
CHST1	0.333201	1.45e-11
NR2F1	0.413969	1.4e-17
A2M	0.628073	3.48e-44
CLEC14A	0.696353	7.4e-58
GNG7	0.362284	1.54e-13
LRRN4CL	0.436221	1.51e-19
HIC1	0.416711	8.17e-18
GPR4	0.615511	4.96e-42
APOLD1	0.644712	3.39e-47
GIMAP7	0.412466	1.88e-17
EGR3	0.373875	2.2e-14
VWA1	0.402163	1.36e-16
FOXS1	0.322908	6.48e-11
CDH5	0.697875	3.31e-58
MYADM	0.385493	2.89e-15
F2R	0.315649	1.8e-10
CREB3L2	0.316644	1.57e-10
P2RY8	0.433282	2.8e-19
SYNM	0.366475	7.68e-14
BGN	0.300216	1.45e-09
NXPH3	0.311643	3.13e-10
CRIP2	0.314267	2.18e-10
COL18A1	0.405586	7.1e-17
TCEAL7	0.412776	1.77e-17
SPNS2	0.455548	2.23e-21
TMEM119	0.359672	2.36e-13
FBXL7	0.472033	4.91e-23
FAM167B	0.531509	8.09e-30
RFLNB	0.350967	9.53e-13
LHFP	0.530271	1.16e-29
CBX6	0.349388	1.22e-12
OLFML1	0.399056	2.43e-16
FAM162B	0.445903	1.89e-20
CCR4	0.306026	6.71e-10
SMTN	0.347268	1.7e-12
CLDN5	0.602838	5.93e-40
SLIT3	0.425652	1.35e-18
PTP4A3	0.365083	9.68e-14
PROS1	0.336878	8.36e-12
PDE4B	0.343728	2.95e-12
FAM43A	0.325962	4.18e-11
IFITM2	0.333624	1.36e-11
IL3RA	0.559207	1.83e-33
PRKG1	0.389743	1.35e-15
NR2F2	0.3318	1.78e-11
GNG2	0.307812	5.27e-10
PDE2A	0.542789	2.91e-31
ERCC6L	-0.301966	1.15e-09
KANK3	0.59985	1.78e-39
C11orf96	0.531023	9.31e-30
COL4A1	0.483196	3.29e-24
GJA4	0.628109	3.43e-44
SAMD11	0.367565	6.4e-14
SPRY4	0.386818	2.28e-15
GABRD	0.348488	1.41e-12
COL14A1	0.574677	1.18e-35
HBA2	0.332724	1.55e-11
PRELP	0.383345	4.23e-15
APOD	0.328936	2.71e-11
PLAC9	0.465102	2.5e-22
PCDH18	0.431334	4.2e-19
CACNA1H	0.435584	1.73e-19
LAMA2	0.462448	4.63e-22
ADH1B	0.360205	2.16e-13
TCF4	0.343795	2.92e-12
ARID5A	0.312326	2.85e-10
ANXA6	0.348564	1.39e-12
FAM110D	0.671522	1.84e-52
TPSB2	0.377524	1.17e-14
KANK2	0.426209	1.21e-18
FBXL22	0.356992	3.64e-13
DACT3	0.42064	3.73e-18
ADARB1	0.317877	1.32e-10
CFD	0.323719	5.77e-11
ADAMTSL2	0.393814	6.42e-16
NUP62CL	-0.322443	6.92e-11
TPM2	0.311747	3.09e-10
PLN	0.372535	2.76e-14
CCDC69	0.477932	1.19e-23
RCSD1	0.304792	7.91e-10
ZNF521	0.434292	2.27e-19
ARHGEF15	0.626407	6.8e-44
GRK5	0.4949	1.73e-25
GPRASP1	0.3322	1.68e-11
SOX18	0.455976	2.02e-21
C10orf128	0.447683	1.28e-20
COL15A1	0.487212	1.21e-24
NOTCH4	0.608199	8.05e-41
C2CD4B	0.417853	6.52e-18
GPX3	0.34477	2.51e-12
ACKR1	0.563973	3.98e-34
GIMAP1	0.424449	1.73e-18
ITGA1	0.493221	2.67e-25
AQP1	0.615826	4.39e-42
INMT	0.467032	1.6e-22
PLEKHO2	0.309809	4.02e-10
HBB	0.341752	3.99e-12
ECSCR	0.64427	4.1e-47
SHANK3	0.537065	1.6e-30
PECAM1	0.605342	2.35e-40
SPON1	0.362587	1.46e-13
GJA5	0.478421	1.06e-23
CCL23	0.327973	3.12e-11
GPIHBP1	0.618827	1.37e-42
